# Supplementary material
Source: publisher figshare collection journal article supplement (https://tandf.figshare.com/ndownloader/files/15456671)
Supplement: Supplementary file 1 [file 15456671]

## Stratigraphic and igneous relationships west of Yass, eastern Lachlan Orogen, southeastern Australia: subsurface structure related to caldera collapse?

C. L. Fergusson<sup>a,\*ID</sup>, B. E. Chenhall<sup>a,c</sup>, S. Guy<sup>a,d</sup>, B. G. Jones<sup>a</sup>, M. Solomons<sup>a,e</sup>, and G. P. Colquhoun<sup>bID</sup>

<sup>a</sup>School of Earth, Atmospheric and Life Sciences, University of Wollongong, NSW 2522, Australia; <sup>c</sup>Geological Survey of New South Wales, Division of Resources and Geoscience, NSW Department of Planning and Environment, 516 High Street, Maitland, NSW 2320, Australia; <sup>e</sup>Now at 31 Dalmacia Drive, Wollongbar, NSW 2477, Australia; <sup>d</sup>Now at PO Box 39, Bassendean, WA, 6934, Australia; <sup>e</sup>Now at 21 Pasco St, Williamstown, VIC 3016, Australia

\*CONTACT C. L. Fergusson [cferguss@uow.edu.au](mailto:cferguss@uow.edu.au)  
C. L. Fergusson <http://orcid.org/0000-0001-8133-4851>  
B. G. Jones <https://orcid.org/0000-0003-0835-7197>  
G. P. Colquhoun <http://orcid.org/0000-0002-0321-0519>

### SUPPLEMENTARY PAPERS

*Australian Journal of Earth Sciences* (2019) 66,  
<https://doi.org/10.1080/08120099.2019.1604358>

---

Copies of Supplementary Papers may be obtained from the Geological Society of Australia's website ([www.gsa.org.au](http://www.gsa.org.au)), the Australian Journal of Earth Sciences website ([www.ajes.com.au](http://www.ajes.com.au)) or from the National Library of Australia's Pandora archive (<https://pandora.nla.gov.au/tep/150555>).

---

### Supplementary paper

Figure S1. Map simplified and reinterpreted from part of the digital seamless geological map of NSW Zone 55East (Colquhoun *et al.*, 2017) showing the negative gravity anomaly, surface geology (Cenozoic units omitted), and location of south-plunging syncline in the Talmo Formation. The upper Black Range Group includes the Kirawin Formation and Sugarloaf Creek Formation underlying the limestones and clastic rocks of the Murrumbidgee Group. The inferred caldera must have extended beyond the outline of the gravity anomaly to at least encompass the downsagged rocks of the Talmo Formation in the domain between the western and eastern lineaments.

### Reference

Colquhoun, G. P., Deyssing, L., Ballard, J. C., Hughes, K. S., & Troedson, A. L. (2017). *New South Wales Zone 55 East Seamless Geology dataset, version 1* [Digital Dataset]. Maitland NSW: Geological Survey of New South Wales.

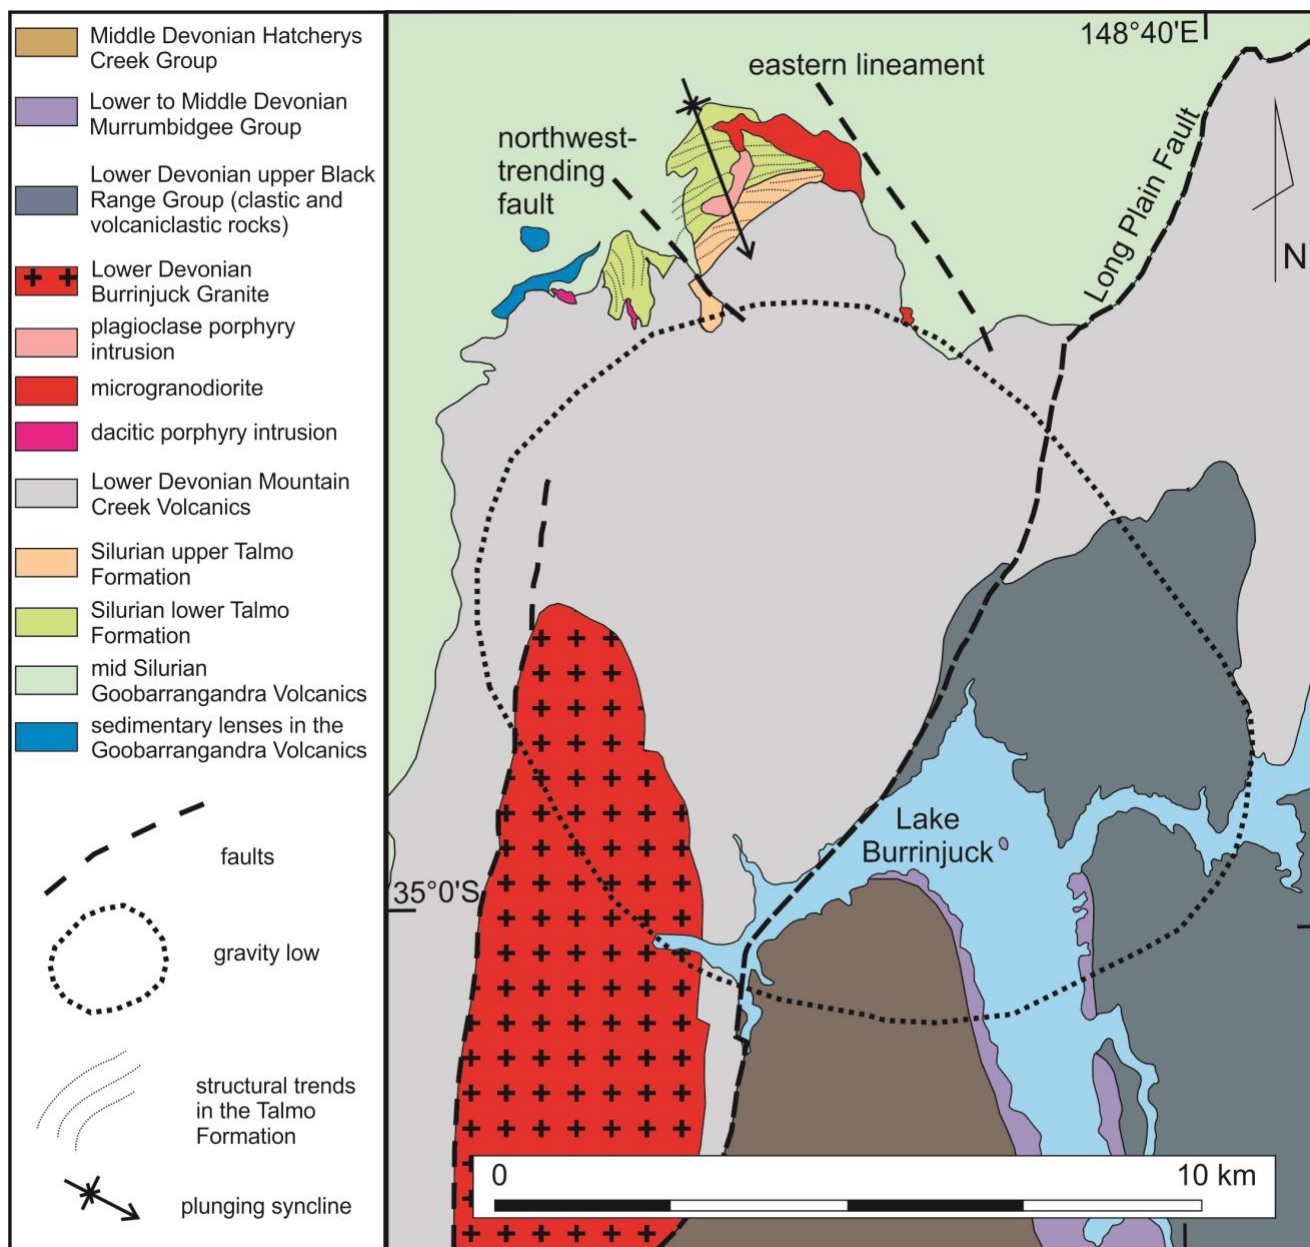

Figure S1. Map simplified and reinterpreted from part of the digital seamless geological map of NSW Zone 55East (Colquhoun *et al.*, 2017) showing the negative gravity anomaly, surface geology (Cenozoic units omitted), and location of south-plunging syncline in the Talmo Formation. The upper Black Range Group includes the Kirawin Formation and Sugarloaf Creek Formation underlying the limestones and clastic rocks of the Murrumbidgee Group. The inferred caldera must have extended beyond the outline of the gravity anomaly to at least encompass the downsagged rocks of the Talmo Formation in the domain between the western and eastern lineaments.

#### Reference

Colquhoun, G. P., Deyssing, L., Ballard, J. C., Hughes, K. S., & Troedson, A. L. (2017). *New South Wales Zone 55 East Seamless Geology dataset, version 1* [Digital Dataset]. Maitland NSW: Geological Survey of New South Wales.
